# Supplementary material for: Circular RNA circERBB2 promotes gallbladder cancer progression by regulating PA2G4-dependent rDNA transcription
Source: PubMed Central journal article supplement (PMC6868820; doi:10.1186/s12943-019-1098-8), 2019-11-21

**a**

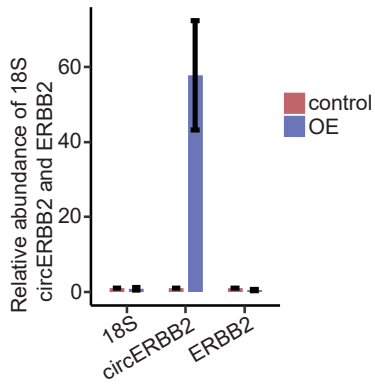

**b**

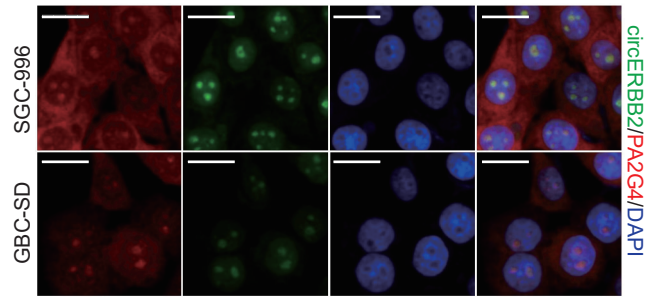

**c**

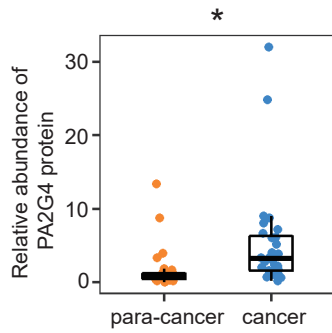

**d**

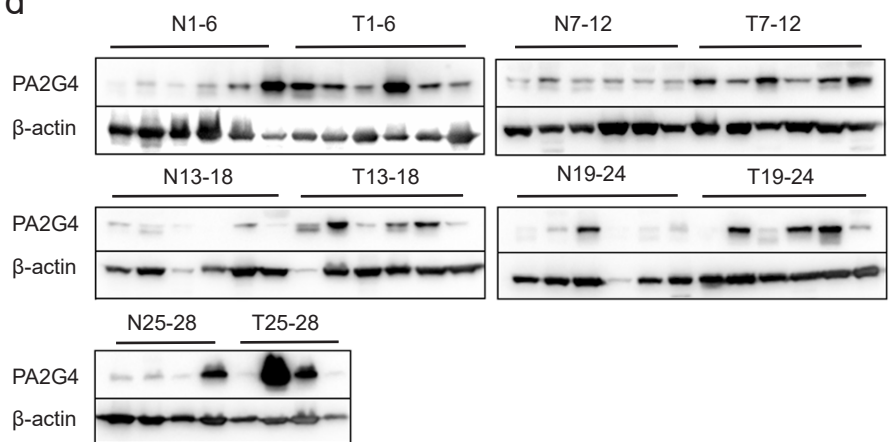

**e**

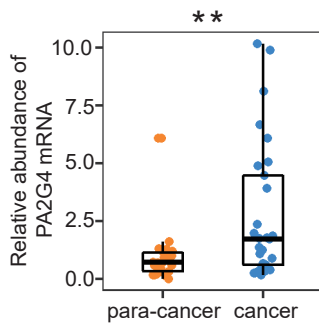

**f**

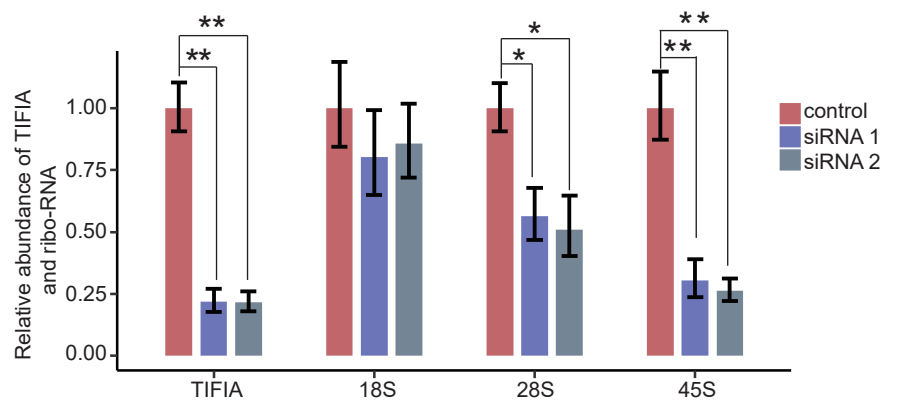

Supplement: 12943_2019_1098_MOESM6_ESM.pdf [file 12943_2019_1098_MOESM6_ESM.pdf]
